# Supplementary material for: Modeling the interactions between stimulation and physiologically induced APs in a mammalian nerve fiber: dependence on frequency and fiber diameter
Source: Springer Nature journal article supplement (doi:10.1007/s10827-018-0703-y), 2018-11-15
Supplement: 10827_2018_703_MOESM1_ESM.pdf [file 10827_2018_703_MOESM1_ESM.pdf]

# Modeling the interactions between stimulation and physiologically induced APs in a mammalian nerve fiber: dependence on frequency and fiber diameter

Vijay Sadashivaiah · Pierre Sacré · Yun Guan · William S. Anderson ·  
Sridevi V. Sarma

## Supplementary information

---

V. Sadashivaiah, P. Sacré, and S. V. Sarma  
Institute for Computational Medicine  
Department of Biomedical Engineering  
The Johns Hopkins University  
Baltimore, MD 21218, USA  
E-mail: vjs@jhu.edu, psacre1@jhu.edu, ssarma2@jhu.edu

Y. Guan  
Department of Anesthesiology/Critical Care Medicine  
The Johns Hopkins University School of Medicine  
Baltimore, MD 21287, USA  
E-mail: yguan1@jhmi.edu

W. S. Anderson  
Department of Neurosurgery  
The Johns Hopkins University School of Medicine  
Baltimore, MD 21287, USA  
E-mail: wanders5@jhmi.edu

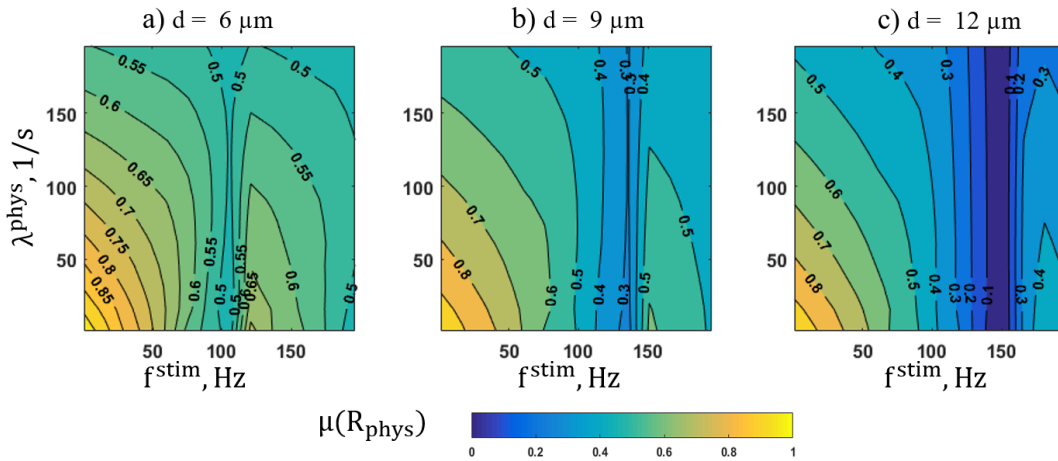

**Fig. S1** Conduction map of physiological APs maps of mechanistic model for 6,9 and 12  $\mu\text{m}$  diameters. Contour map of conduction reliability values for a range ( $1\text{ s}^{-1}$  to  $200\text{ s}^{-1}$ ) of physiological frequency (Y-axis) and (1 Hz to 200 Hz) stimulus frequency (X-axis). Color gradient represents the mean of reliability values (0-1) with yellow (1) being the highest relay and purple (0) being the lowest.

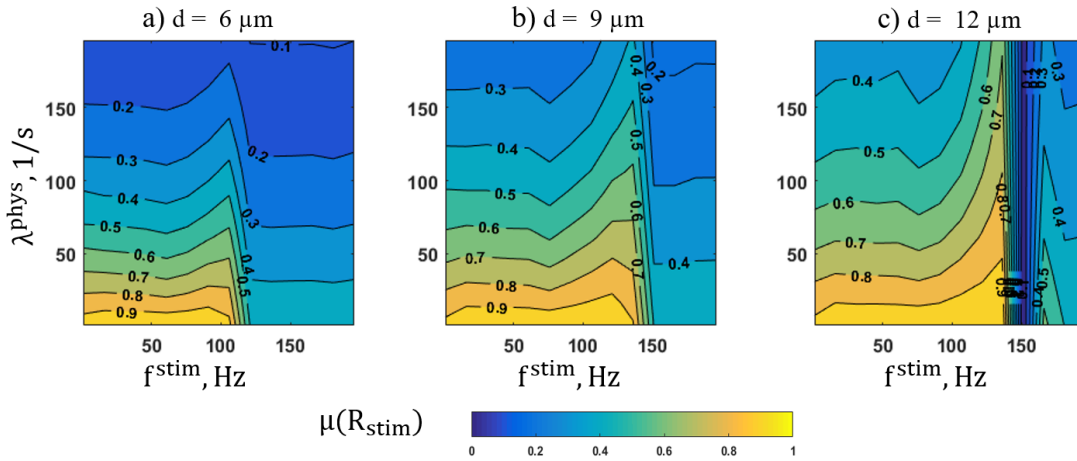

**Fig. S2** Conduction map of stimulus APs of mechanistic model for 6,9 and 12  $\mu\text{m}$  diameters. Contour map of reliability values for a range ( $1\text{ s}^{-1}$  to  $200\text{ s}^{-1}$ ) of physiological frequency (Y-axis) and (1 Hz to 200 Hz) stimulus frequency (X-axis). Color gradient represents the mean of reliability values (0-1) with yellow (1) being the highest relay and purple (0) being the lowest.

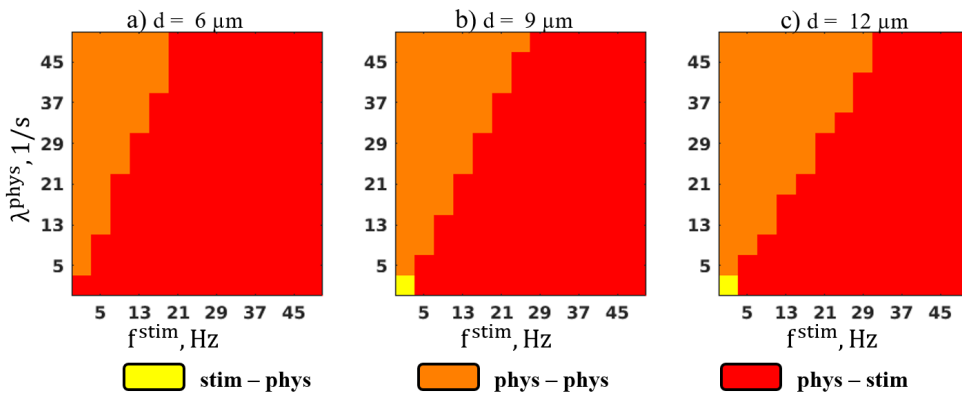

**Fig. S3** Dominance of interactions in a conduction map. Yellow represents stimulus – physiological loss of excitability, orange represents physiological – physiological loss of excitability and red represents physiological – stimulus loss of excitability. Dominance represents the interaction type with maximum interaction count.

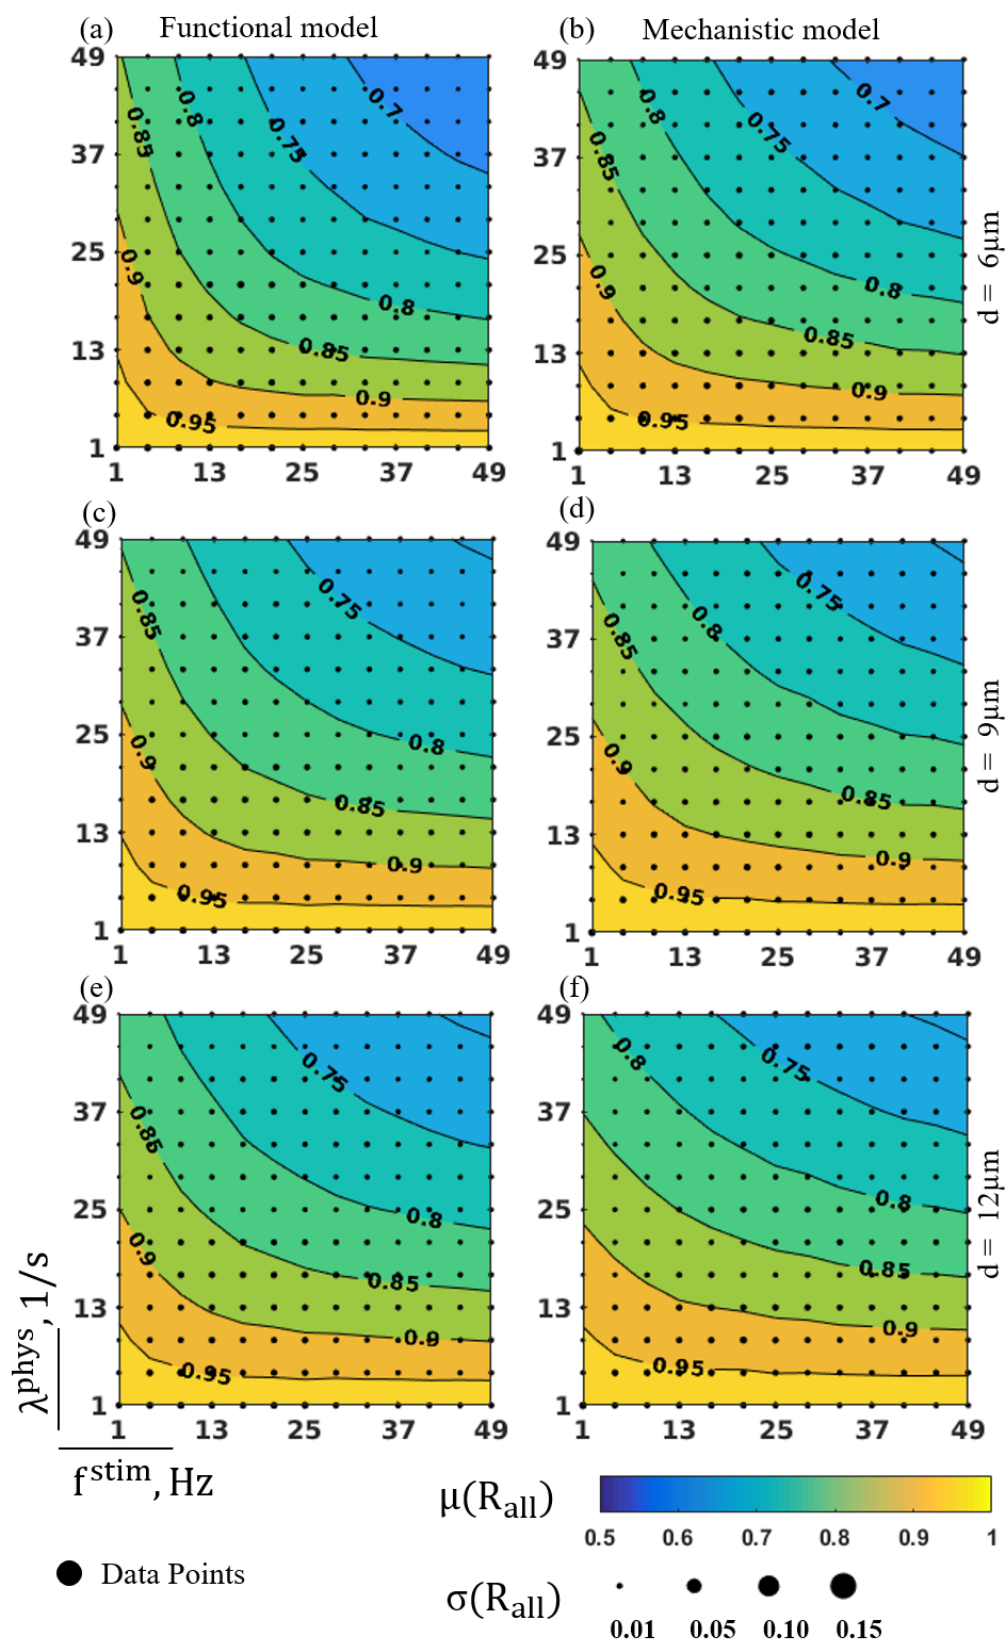

**Fig. S4** Conduction maps of all action potentials for functional and mechanistic models. Contour map of reliability values for a range ( $1\text{ s}^{-1}$  to  $200\text{ s}^{-1}$ ) of physiological frequency (Y-axis) and (1 Hz to 200 Hz) stimulus frequency (X-axis). Black dots represent the data points. Color gradient represents the mean of reliability values ( $\mu(R_{\text{all}}) = [0.5-1]$ ). Size of the dot represents the standard deviation ( $\sigma(R_{\text{all}})$ ) of reliability values..

**Table S1** Three group, one-way ANOVA statistics for interaction count in 6  $\mu\text{m}$ , 9  $\mu\text{m}$  and 12  $\mu\text{m}$  diameter fibers

|        | Interaction | collision |                   | phys - phys |                   | phys - stim |                   | stim - phys |                   |
|--------|-------------|-----------|-------------------|-------------|-------------------|-------------|-------------------|-------------|-------------------|
|        | Measure     | <i>p</i>  | <i>F</i> (2, 147) | <i>p</i>    | <i>F</i> (2, 147) | <i>p</i>    | <i>F</i> (2, 147) | <i>p</i>    | <i>F</i> (2, 147) |
| Region | 1           | 0.62      | 0.48              | 0.14        | 1.98              | 3e-4        | 8.58              | 0.908       | 0.098             |
|        | 2           | 2.86e-08  | 19.59             | 8.34e-32    | 121.074           | 1.98e-22    | 71.56             | 1.77e-3     | 6.61              |
|        | 3           | 5.58e-22  | 69.54             | 7.78e-13    | 33.90             | 3.77e-45    | 222.08            | 5.61e-05    | 10.46             |
|        | 4           | 1.92e-05  | 11.70             | 0.08        | 2.46              | 2.19e-31    | 118.54            | 0.03        | 3.52              |
|        | 5           | 4.72e-45  | 221.18            | 1.34e-17    | 51.18             | 1.40e-32    | 125.87            | 4.93e-14    | 38.01             |
